# Supplementary material for: Height loss with age in adults with Prader-Willi syndrome may result in artifactual increases in BMI
Source: Research Square preprint supplement (doi:10.21203/rs.3.rs-6064456/v1), 2025-03-26
Supplement: Supplementary file 1 [file 29c6044d91055ebd8a0b8513.docx]

Table 1. BMI values for four individuals with Prader-Willi syndrome and height loss

|  | Pt. 1 | Pt. 2 | Pt. 3 | Pt. 4 |
| --- | --- | --- | --- | --- |
| Age (years)at latest measurement | 42.5 | 32.4 | 37.1 | 30.2 |
| Sex | F | M | F | M |
| PWS genotype | IC | UPD | DEL | DEL |
| Duration of follow-up (yrs) | 15.7 | 7.9 | 16.1 | 10.1 |
| H-1 (cm) | 152.0 | 142.6 | 148.5 | 145.5 |
| H-2 (cm) | 145.8 | 136.0 | 141.5 | 139.2 |
| Height loss (cm) | -6.2 | -6.6 | -7.0 | -6.3 |
| BMI (kg/m2) for measured height | 41.7 | 31.9 | 31.0 | 27.2 |
| BMI (kg/m2) for estimated "true" height | 37.9 | 29.1 | 28.5 | 24.8 |

Table legend: BMI values for the four adults with PWS whose measured heights decreased significantly. PWS genotypes: IC, imprinting center defect; UPD, uniparental disomy; DEL, deletion. H-1 is the tallest height measured after age 20 years. H-2 is the height measured at the latest clinic visit. Height loss is the value of H-2 minus H-1. BMI (weight in kg/[height in m]2) values were calculated using the weight at the latest clinic visit, height at the latest clinic visit (H-2), and then recalculated assuming "true" height (H-1) .
